# Supplementary material for: Speech Sounds Production, Narrative Skills, and Verbal Memory of Children with 22q11.2 Microdeletion
Source: MDPI journal article supplement (doi:10.3390/children11040489), 2024-04-19
Supplement: s1 [file s1]

**Table S3.** Summary of publications on speech, language, and memory abilities of children with 22q11.2DS

| Language studied | Articulation skills                                                                                                                                                                                                                                                                     | Expressive language abilities                                                                                                                                  | Receptive language abilities | Verbal memory                        | Reference  |
|------------------|-----------------------------------------------------------------------------------------------------------------------------------------------------------------------------------------------------------------------------------------------------------------------------------------|----------------------------------------------------------------------------------------------------------------------------------------------------------------|------------------------------|--------------------------------------|------------|
| Serbian          | Lower number of adequately pronounced sounds; Higher number of marginally pronounced phonemes, pathologically distorted sounds and pathologically substituted or omitted phonemes; Pathologically pronounced phonemes from 4 groups (laterals, fricatives, affricates and vibrant R(r)) | Lower expressive language abilities (smaller number of sentences, grammatically correct sentences and words produced when describing the events in the images) | Not affected                 | Immediate verbal memory not affected | This study |
| Serbian          | Higher number of misarticulated phonemes; Deficit in oral praxis                                                                                                                                                                                                                        | Delay in production of the first word; Delay in language development                                                                                           | NA                           | NA                                   | [21]       |
| English          | Limited consonant inventories of young children                                                                                                                                                                                                                                         | Impaired                                                                                                                                                       | Impaired                     | NA                                   | [27]       |
| English          | Impaired                                                                                                                                                                                                                                                                                | Language difficulties in diverse linguistic domains such as syntax, vocabulary, concepts, word finding, and discourse organization                             | Delayed                      | NA                                   | [14]       |
| English          | Persistent articulation and resonance disorders; Voice impairment                                                                                                                                                                                                                       | Lower scores on expressive language skills                                                                                                                     | NA                           | NA                                   | [11]       |
| English          | Smaller consonant inventories; Higher                                                                                                                                                                                                                                                   | NA                                                                                                                                                             | NA                           | NA                                   | [23]       |

|         |                                                                         |                                                                                                                           |                               |                                                                  |      |
|---------|-------------------------------------------------------------------------|---------------------------------------------------------------------------------------------------------------------------|-------------------------------|------------------------------------------------------------------|------|
|         | number of developmental errors; Higher frequency of glottal stop use    |                                                                                                                           |                               |                                                                  |      |
| English | Disturbed voice quality, low facial tone, articulation errors           | Delayed                                                                                                                   | Delayed                       | NA                                                               | [38] |
| English | NA                                                                      | Impaired                                                                                                                  | Impaired                      | NA                                                               | [37] |
| Swedish | Impaired (stops and fricatives were the most misarticulated consonants) | NA                                                                                                                        | NA                            | NA                                                               | [13] |
| English | NA                                                                      | NA                                                                                                                        | NA                            | Poor performance on verbal working memory test                   | [43] |
| English | NA                                                                      | Poor expressive language performance                                                                                      | NA                            | Poor verbal working memory                                       | [45] |
| Swedish | NA                                                                      | Lower narrative retell abilities (difficulties in conveying information, short sentences with low grammatical complexity) | Low receptive language scores | NA                                                               | [31] |
| English | NA                                                                      | Delay in expressive language milestones                                                                                   | Not affected                  | NA                                                               | [28] |
| French  | NA                                                                      | NA                                                                                                                        | NA                            | Impaired performance on the serial order short-term memory tasks | [44] |
| English | NA                                                                      | NA                                                                                                                        | NA                            | Impaired verbal memory                                           | [41] |
| Greek   | NA                                                                      | Comparable at age 6 and lower at age 10                                                                                   | Not affected                  | NA                                                               | [39] |

|                   |                                                                                                                                     |                                                        |                                                                                                                                                                  |              |      |
|-------------------|-------------------------------------------------------------------------------------------------------------------------------------|--------------------------------------------------------|------------------------------------------------------------------------------------------------------------------------------------------------------------------|--------------|------|
| English/<br>Dutch | NA                                                                                                                                  | Shorter and less<br>grammatically<br>complex sentences | NA                                                                                                                                                               | NA           | [33] |
| Dutch             | NA                                                                                                                                  | NA                                                     | Word comprehension<br>slightly to severely<br>weakened in relation<br>to chronological age<br>norms; Difficulties<br>with comprehension<br>at the sentence level | Not affected | [42] |
| Spanish           | Impaired<br>(difficulties in the<br>articulation of<br>fricatives, affricates<br>and vibrant rhotic<br>consonant clusters +<br>/r/) | NA                                                     | NA                                                                                                                                                               | NA           | [26] |
| Dutch             | NA                                                                                                                                  | Impaired                                               | NA                                                                                                                                                               | NA           | [29] |
| French            | NA                                                                                                                                  | Poor performance on<br>verbal learning                 | NA                                                                                                                                                               | NA           | [46] |

NA – not analyzed
