# Supplementary material for: Speech Sounds Production, Narrative Skills, and Verbal Memory of Children with 22q11.2 Microdeletion
Source: MDPI journal article supplement (doi:10.3390/children11040489), 2024-04-19
Supplement: s1 [file s1]

**Table S1.** Description of the children from groups E1, E2, E3 and C

| No.       | No. of patient | Age (years) | Sex | Presence of 22q11.2 microdeletion | CHM | Facial dysmorphism | Hypocalcemia  | Thymic hypoplasia | Cleft palate | Reference  |
|-----------|----------------|-------------|-----|-----------------------------------|-----|--------------------|---------------|-------------------|--------------|------------|
| <b>E1</b> |                |             |     |                                   |     |                    |               |                   |              |            |
| <b>1</b>  | <b>1</b>       | 6.5         | M   | +                                 | +   | +                  | +             | -                 | -            | [21,22]    |
| <b>2</b>  | <b>3</b>       | 6.5         | M   | +                                 | +   | +                  | -             | -                 | -            | [21,22]    |
| <b>3</b>  | <b>4</b>       | 9           | M   | +                                 | +   | -                  | +             | -                 | -            | [21,22]    |
| <b>4</b>  | <b>6</b>       | 5.5         | M   | +                                 | +   | -                  | +             | -                 | -            | [21,22]    |
| <b>5</b>  | <b>7</b>       | 9           | M   | +                                 | +   | +                  | -             | -                 | -            | [21,22]    |
| <b>6</b>  | <b>11</b>      | 6.5         | F   | +                                 | +   | +                  | +             | +                 | -            | [21,22]    |
| <b>7</b>  | <b>12</b>      | 5.5         | M   | +                                 | +   | -                  | -             | +                 | -            | [21,22]    |
| <b>8</b>  | <b>13</b>      | 6           | F   | +                                 | +   | -                  | -             | +                 | -            | [21,22]    |
| <b>9</b>  | <b>14</b>      | 9.5         | M   | +                                 | +   | +                  | +             | -                 | -            | [21,22]    |
| <b>10</b> | <b>15</b>      | 8           | F   | +                                 | +   | +                  | -             | -                 | -            | [18,22]    |
| <b>11</b> | <b>31</b>      | 7.5         | M   | +                                 | +   | +                  | +             | -                 | -            | [18,22]    |
| <b>12</b> | <b>33</b>      | 9.5         | F   | +                                 | +   | +                  | +             | +                 | -            | [21]       |
| <b>13</b> | <b>35</b>      | 6           | F   | +                                 | +   | -                  | -             | +                 | -            | [22]       |
| <b>14</b> | <b>40</b>      | 7.5         | F   | +                                 | +   | +                  | +             | -                 | -            | this study |
| <b>15</b> | <b>60</b>      | 6           | F   | +                                 | +   | +                  | -             | -                 | -            | this study |
| <b>E2</b> |                |             |     |                                   |     |                    |               |                   |              |            |
| <b>1</b>  | <b>2</b>       | 6           | M   | -                                 | +   | +                  | -             | -                 | -            | [21,22]    |
| <b>2</b>  | <b>16</b>      | 10          | M   | -                                 | +   | +                  | -             | +                 | -            | [21,22]    |
| <b>3</b>  | <b>17</b>      | 5.5         | M   | -                                 | +   | +                  | -             | -                 | -            | [21,22]    |
| <b>4</b>  | <b>19</b>      | 10          | M   | -                                 | +   | +                  | -             | -                 | -            | [21,22]    |
| <b>5</b>  | <b>21</b>      | 6           | F   | -                                 | +   | +                  | -             | +                 | -            | [21]       |
| <b>6</b>  | <b>22</b>      | 9           | F   | -                                 | +   | +                  | -             | -                 | -            | [21,22]    |
| <b>7</b>  | <b>23</b>      | 8           | M   | -                                 | +   | +                  | -             | +                 | -            | [22]       |
| <b>8</b>  | <b>25</b>      | 6           | M   | -                                 | +   | +                  | not available | +                 | -            | [21]       |
| <b>9</b>  | <b>26</b>      | 6           | M   | -                                 | +   | +                  | -             | -                 | -            | [21,22]    |
| <b>10</b> | <b>27</b>      | 7           | M   | -                                 | +   | +                  | +             | -                 | -            | [21]       |
| <b>11</b> | <b>28</b>      | 6.5         | M   | -                                 | +   | +                  | -             | -                 | -            | [21]       |
| <b>12</b> | <b>32</b>      | 5.5         | F   | -                                 | +   | +                  | +             | -                 | -            | [21]       |
| <b>13</b> | <b>41</b>      | 9           | F   | -                                 | +   | +                  | -             | -                 | -            | [22]       |

|           |            |      |   |   |   |   |   |   |   |            |
|-----------|------------|------|---|---|---|---|---|---|---|------------|
| <b>14</b> | <b>64</b>  | 5.5  | F | - | + | + | - | - | + | this study |
| <b>E3</b> |            |      |   |   |   |   |   |   |   |            |
| <b>1</b>  | <b>44</b>  | 10   | M | - | + | - | - | - | - | this study |
| <b>2</b>  | <b>45</b>  | 11   | F | - | + | - | - | - | - | this study |
| <b>3</b>  | <b>47</b>  | 7    | M | - | + | - | - | - | - | this study |
| <b>4</b>  | <b>49</b>  | 11.5 | M | - | + | - | - | - | - | this study |
| <b>5</b>  | <b>51</b>  | 6    | M | - | + | - | - | - | - | this study |
| <b>6</b>  | <b>29</b>  | 6.5  | M | - | + | - | - | - | - | this study |
| <b>7</b>  | <b>34</b>  | 10   | M | - | + | - | - | - | - | this study |
| <b>8</b>  | <b>53</b>  | 6    | F | - | + | - | - | - | - | this study |
| <b>9</b>  | <b>54</b>  | 10.5 | M | - | + | - | - | - | - | this study |
| <b>10</b> | <b>56</b>  | 5.5  | F | - | + | - | - | - | - | this study |
| <b>11</b> | <b>57</b>  | 8.5  | F | - | + | - | - | - | - | this study |
| <b>12</b> | <b>58</b>  | 10   | F | - | + | - | - | - | - | this study |
| <b>13</b> | <b>61</b>  | 12   | M | - | + | - | - | - | - | this study |
| <b>14</b> | <b>62</b>  | 7    | M | - | + | - | - | - | - | this study |
| <b>C</b>  |            |      |   |   |   |   |   |   |   |            |
| <b>1</b>  | <b>C1</b>  | 8    | F | - | - | - | - | - | - | [21]       |
| <b>2</b>  | <b>C2</b>  | 10   | M | - | - | - | - | - | - | [21]       |
| <b>3</b>  | <b>C3</b>  | 9.5  | M | - | - | - | - | - | - | [21]       |
| <b>4</b>  | <b>C4</b>  | 7.5  | F | - | - | - | - | - | - | [21]       |
| <b>5</b>  | <b>C5</b>  | 7.5  | F | - | - | - | - | - | - | [21]       |
| <b>6</b>  | <b>C7</b>  | 6.5  | M | - | - | - | - | - | - | [21]       |
| <b>7</b>  | <b>C10</b> | 5.5  | M | - | - | - | - | - | - | [21]       |
| <b>8</b>  | <b>C11</b> | 7    | F | - | - | - | - | - | - | [21]       |
| <b>9</b>  | <b>C14</b> | 6    | M | - | - | - | - | - | - | [21]       |
| <b>10</b> | <b>C16</b> | 6    | M | - | - | - | - | - | - | [21]       |
| <b>11</b> | <b>C17</b> | 6    | M | - | - | - | - | - | - | [21]       |
| <b>12</b> | <b>C20</b> | 6    | M | - | - | - | - | - | - | this study |
| <b>13</b> | <b>C21</b> | 6    | M | - | - | - | - | - | - | this study |
| <b>14</b> | <b>C22</b> | 5.5  | M | - | - | - | - | - | - | this study |
