# Supplementary material for: Speech Sounds Production, Narrative Skills, and Verbal Memory of Children with 22q11.2 Microdeletion
Source: Children (Basel). 2024 Apr 19;11(4):489. doi: 10.3390/children11040489 (PMC11049265; doi:10.3390/children11040489)
Supplement: Supplementary file 1 [file children-11-00489-s001.zip › Table S2.xls]

## Sheet: Table S1  
Table S2. The quality of the pronounced phonemes by children from groups E1, E2, E3, and C
			vowels					plosives						nasals			laterals		fricatives						affricates					semivowels		vibrant
Group	No.	No. of patient	a	e	i	o	u	p	b	t	d	k	g	m	n	nj	l	lj	f	s	z	š	ž	h	c	ć	đ	č	dž	v	j	r
E1	1	1	4	4	4	4	4	4	4	4	4	4	4	3	3	3	7	7	3	3	3	7	7	3	6	6	6	7	7	3	3	6
E1	2	3	3	3	3	3	3	3	3	3	3	3	3	3	3	3	3	7	3	5	5	7	7	3	7	7	6	6	5	3	4	4
E1	3	4	4	3	3	3	3	3	3	3	3	3	3	3	3	3	3	3	3	4	4	5	5	3	4	5	5	7	7	3	3	7
E1	4	6	4	4	4	4	4	4	3	3	7	7	7	3	3	3	7	7	7	7	7	7	7	7	7	7	7	7	7	3	3	7
E1	5	7	3	3	3	4	4	5	5	5	5	4	4	3	3	3	4	7	5	7	7	7	7	4	6	6	6	7	7	4	3	7
E1	6	11	3	3	3	3	3	3	3	5	5	3	3	3	3	7	7	7	3	5	5	7	7	3	6	6	6	7	7	3	3	7
E1	7	12	5	5	5	5	5	4	4	4	4	4	4	3	3	3	4	5	3	5	5	5	5	3	5	5	7	5	5	4	3	4
E1	8	13	4	4	4	4	4	4	4	4	4	4	4	3	3	3	3	7	5	5	5	5	5	5	5	5	7	5	5	5	5	5
E1	9	14	4	4	4	4	4	3	3	3	3	3	3	3	3	3	4	4	3	3	3	3	3	3	5	5	5	4	4	3	3	7
E1	10	15	3	3	3	3	3	3	3	5	5	3	3	3	3	3	6	7	3	5	5	6	6	6	6	6	6	7	7	3	3	7
E1	11	31	3	3	3	3	3	3	3	5	5	3	3	3	3	6	6	6	3	3	3	5	3	3	5	5	5	5	5	3	3	3
E1	12	33	4	4	4	4	4	4	4	3	3	3	3	3	3	3	3	3	3	3	3	3	3	3	3	3	3	3	3	3	3	4
E1	13	35	3	3	3	3	3	3	3	4	4	3	7	3	3	6	4	7	3	4	5	7	7	3	7	5	6	7	7	3	3	7
E1	14	40	3	3	3	3	3	3	3	5	5	3	3	3	3	3	6	6	3	5	5	6	6	3	3	3	6	6	6	3	3	6
E1	15	60	3	3	3	3	3	3	3	3	3	3	3	3	3	3	7	7	3	5	5	6	6	3	3	7	7	7	7	3	3	7
E2	1	2	3	3	3	3	3	3	3	3	3	3	3	3	3	3	3	7	3	3	3	3	3	3	3	3	3	3	3	3	3	7
E2	2	16	3	3	3	3	3	3	3	4	4	3	3	3	3	3	3	3	3	3	3	4	4	3	3	3	3	4	4	3	3	3
E2	3	17	3	3	3	3	3	3	4	3	3	3	3	3	3	3	5	7	3	4	4	7	7	3	3	7	7	7	7	3	3	7
E2	4	19	3	3	3	3	3	3	3	3	3	3	3	3	3	3	3	7	3	3	3	3	3	3	3	3	3	3	3	3	3	3
E2	5	21	3	3	3	3	3	3	3	3	3	3	3	3	3	3	3	7	3	3	3	6	6	3	3	3	3	6	6	3	3	3
E2	6	22	3	3	3	3	3	3	3	3	3	3	3	3	3	3	3	7	3	3	3	7	7	3	5	6	4	7	7	3	3	7
E2	7	23	3	3	3	3	3	3	3	3	3	3	3	3	3	3	3	3	3	3	3	3	3	3	4	4	4	4	4	3	3	4
E2	8	25	3	3	3	3	3	3	3	3	3	3	3	3	3	3	3	3	3	3	3	3	3	3	3	3	3	3	3	3	3	3
E2	9	26	4	4	4	4	4	7	7	3	3	3	3	3	3	3	3	3	3	3	3	6	6	3	5	5	5	6	6	3	3	7
E2	10	27	3	3	3	3	3	3	3	3	3	3	3	3	3	3	3	3	3	3	3	3	3	3	5	5	5	3	3	3	3	6
E2	11	28	3	3	3	3	3	3	3	3	3	3	3	3	3	3	3	3	3	3	3	3	3	3	3	3	3	3	3	3	3	3
E2	12	32	3	3	3	3	3	3	3	3	3	3	3	3	3	3	3	3	3	3	3	3	3	3	5	5	5	3	3	3	3	7
E2	13	41	3	3	3	3	3	5	4	4	4	5	7	4	4	4	6	4	3	4	4	7	7	3	3	3	3	7	7	3	3	7
E2	14	64	3	3	3	3	3	3	3	4	4	3	3	3	3	7	3	3	3	3	3	6	6	7	7	5	6	6	7	3	3	7
E3	1	44	3	3	3	3	3	3	3	3	3	3	3	3	3	3	3	3	3	3	3	3	3	3	3	3	3	3	3	3	3	3
E3	2	45	3	3	3	3	3	3	3	3	3	3	3	3	3	3	3	3	3	3	3	3	3	3	3	3	3	3	3	3	3	3
E3	3	47	3	3	3	3	3	3	3	3	3	3	3	3	3	3	3	7	3	3	3	3	3	3	3	3	3	6	6	3	3	7
E3	4	49	3	3	3	3	3	3	3	3	3	3	3	3	3	3	3	7	3	3	3	3	3	3	3	3	3	3	3	3	3	7
E3	5	51	3	3	3	3	3	3	3	3	3	3	3	3	3	3	7	7	3	3	3	3	3	3	3	3	3	6	6	3	3	7
E3	6	29	3	3	3	3	3	3	3	4	4	3	3	3	3	3	3	3	3	3	3	3	3	3	3	3	3	3	3	3	3	3
E3	7	34	3	3	3	3	3	3	3	3	3	3	3	3	3	3	3	3	3	3	3	3	3	3	3	3	3	3	3	3	3	3
E3	8	53	3	3	3	3	3	3	3	3	3	3	3	3	3	3	7	7	3	3	3	6	6	3	7	7	7	7	7	3	3	7
E3	9	54	3	3	3	3	3	3	3	3	3	3	3	3	3	3	3	3	3	3	3	3	3	3	3	3	3	3	3	3	3	3
E3	10	56	3	3	3	3	3	3	3	3	3	3	3	3	3	3	3	3	3	3	3	3	3	3	3	3	3	3	3	3	3	3
E3	11	57	3	3	3	3	3	3	3	3	3	3	3	3	3	3	3	7	3	3	3	3	3	3	3	6	6	3	3	3	3	3
E3	12	58	3	3	3	3	3	3	3	3	3	3	3	3	3	3	3	3	3	3	3	5	5	3	3	3	3	5	5	3	3	3
E3	13	61	3	3	3	3	3	3	3	3	3	3	3	3	3	3	3	3	3	3	3	3	3	3	3	3	3	3	3	3	3	3
E3	14	62	3	3	3	3	3	3	3	3	3	3	3	3	3	3	3	3	3	3	3	3	3	3	3	3	3	3	3	3	3	3
C	1	C1	3	3	3	3	3	3	3	3	3	3	3	3	3	3	3	3	3	3	3	3	3	3	3	3	3	3	3	3	3	3
C	2	C2	3	3	3	3	3	3	3	3	3	3	3	3	3	3	3	3	3	3	3	3	3	3	3	3	3	3	3	3	3	3
C	3	C3	3	3	3	3	3	3	3	3	3	3	3	3	3	3	3	3	3	3	3	3	3	3	3	3	3	3	3	3	3	3
C	4	C4	3	3	3	3	3	3	3	3	3	3	3	3	3	3	3	3	3	3	3	3	3	3	3	3	3	3	3	3	3	3
C	5	C5	3	3	3	3	3	3	3	3	3	3	3	3	3	3	3	3	3	3	3	3	3	3	3	3	3	3	3	3	3	3
C	6	C6	3	3	3	3	3	3	3	3	3	3	3	3	3	3	3	3	3	3	3	3	3	3	3	3	3	3	3	3	3	3
C	7	C7	3	3	3	3	3	3	3	3	3	3	3	3	3	3	3	5	3	3	3	3	3	3	3	3	3	3	3	3	3	6
C	8	C8	3	3	3	3	3	3	3	3	3	3	3	3	3	3	3	3	3	3	3	3	3	3	3	3	3	3	3	3	3	6
C	9	C9	3	3	3	3	3	3	3	3	3	3	3	3	3	3	3	3	3	3	3	3	3	3	3	3	3	3	3	3	3	3
C	10	C10	3	3	3	3	3	3	3	3	3	3	3	3	3	3	3	3	3	3	3	3	3	3	3	3	3	3	3	3	3	3
C	11	C11	3	3	3	3	3	3	3	3	3	3	3	3	3	3	3	3	3	3	3	3	3	3	3	3	3	3	3	3	3	3
C	12	C12	3	3	3	3	3	3	3	3	3	3	3	3	3	3	3	3	3	3	3	3	3	3	3	3	3	3	3	3	3	3
C	13	C13	3	3	3	3	3	3	3	3	3	3	3	3	3	3	3	3	3	3	3	3	3	3	3	3	3	3	3	3	3	3
C	14	C14	3	3	3	3	3	3	3	3	3	3	3	3	3	3	3	3	3	3	3	3	3	3	3	3	3	3	3	3	3	3
Scoring of phonemes pronunciation
1, 2, 3 - adequately pronounced phonemes; 4 - marginally pronounced phonemes; 5, 6 - phonemes pronounced in a distorted way; 7 - omitted and substituted phonemes
